# Supplementary material for: Predicting bioprocess targets of chemical compounds through integration of chemical-genetic and genetic interactions
Source: PubMed Central journal article supplement (PMC6226211; doi:10.1371/journal.pcbi.1006532), 2018-10-30

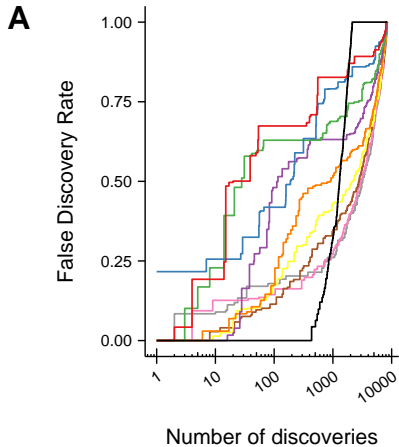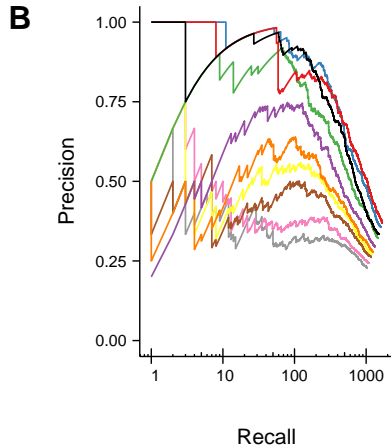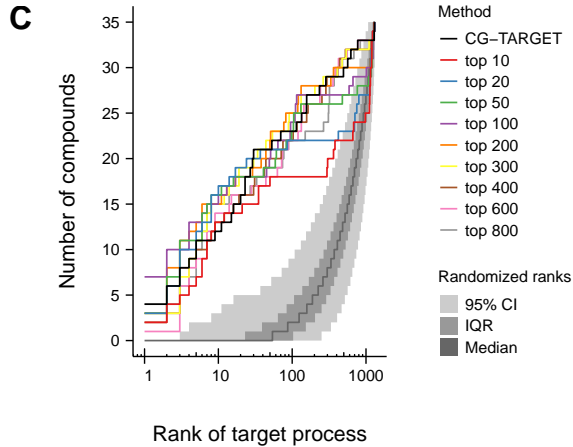

Supplement: pcbi.1006532.s002.pdf [file pcbi.1006532.s002.pdf]
