# Supplementary material for: Predicting bioprocess targets of chemical compounds through integration of chemical-genetic and genetic interactions
Source: PLoS Comput Biol. 2018 Oct 30;14(10):e1006532. doi: 10.1371/journal.pcbi.1006532 (PMC6226211; doi:10.1371/journal.pcbi.1006532)
Supplement: S2 Table — Compounds, GO biological processes, and protein complexes are shown if the mode-of-action prediction to the protein complex was stronger than that to the associated GO biological process (comparison first based on p-value, then on z-score in the case of a tie). Protein complexes were limited to those of size 4 or greater whose gene annotations were a subset of those for the corresponding GO biological process term. The final column indicates compounds that did not achieve a false discovery rate of 25% or less for any GO biological process mode-of-action predictions but did for at least one protein complex prediction (with “HCS” denoting “high confidence set”). (XLSX) [file pcbi.1006532.s006.xlsx]

## Sheet: Table S1
Table S2. Using protein complexes to refine CG-TARGET GO biological process mode-of-action predictions. Compounds, GO biological processes, and protein complexes are shown if the mode-of-action prediction to the protein complex was stronger than that to the associated GO biological process (comparison first based on p-value, then on z-score in the case of a tie). Protein complexes were limited to…

## Sheet: GO vs. complex comparisons
compound	GO ID	GO name	complex name	GO size	complex size	GO z-score	GO p-value	GO FDR	complex z-score	complex p-value	complex FDR	complex caused HCS entry?
NPD4166	GO:0006378	mRNA polyadenylation	mRNA cleavage factor complex	8	4	2.83921	0.0038	1	4.13197	0	0	FALSE
NPD7586	GO:0002181	cytoplasmic translation	cytoplasmic ribosomal large subunit	51	24	2.68739	0.005	1	6.48133	6e-05	0.0833062	FALSE
Latrunculin B	GO:0002181	cytoplasmic translation	cytoplasmic ribosomal large subunit	51	24	2.91769	0.0024	0.890052	4.37224	0	0	FALSE
NPD5954	GO:0007035	vacuolar acidification	H+-transporting ATPase, Golgi	14	5	1.14316	0.1256	1	6.52085	0.0001	0.110516	FALSE
NPD5954	GO:0007035	vacuolar acidification	H+-transporting ATPase, vacuolar	14	5	1.14316	0.1256	1	6.52085	0.0001	0.110516	FALSE
NPE1180	GO:0060237	regulation of fungal-type cell wall organization	PKC pathway	8	4	2.31628	0.0154	1	5.91177	0.00012	0.119636	FALSE
NP344	GO:0060237	regulation of fungal-type cell wall organization	PKC pathway	8	4	3.0463	0.0056	1	5.53181	0.00018	0.154572	FALSE
NPD7834	GO:0007126	meiosis	COMA complex	39	6	0.239729	0.3892	1	3.78516	0.0002	0.158045	FALSE
NPE241	GO:0002181	cytoplasmic translation	cytoplasmic ribosomal large subunit	51	24	1.66199	0.0467	1	3.73083	0.0002	0.158045	FALSE
NPD5449	GO:0060237	regulation of fungal-type cell wall organization	PKC pathway	8	4	2.27302	0.0103	1	3.69451	0.0002	0.158045	FALSE
NPD7834	GO:0007067	mitosis	COMA complex	59	6	2.66157	0.0055	1	3.78516	0.0002	0.158045	FALSE
NPD6549	GO:0002181	cytoplasmic translation	cytoplasmic ribosomal large subunit	51	24	2.84221	0.0039	1	3.92874	0.0002	0.158045	FALSE
NPD4188	GO:0006348	chromatin silencing at telomere	COMPASS complex	25	5	2.05367	0.02696	1	6.12483	0.00022	0.165528	FALSE
NPD7796	GO:0006348	chromatin silencing at telomere	COMPASS complex	25	5	2.53893	0.0067	1	6.09169	0.00022	0.165528	FALSE
NPD1256	GO:0006887	exocytosis	exocyst	15	5	2.7427	0.0037	1	4.64072	0.00022	0.165528	FALSE
NPE616	GO:0002181	cytoplasmic translation	cytoplasmic ribosomal large subunit	51	24	3.6538	0.00274	0.949832	5.91162	0.00012	0.119636	FALSE
NPD6099	GO:0032258	CVT pathway	Golgi transport complex	18	6	2.57991	0.0077	1	6.81313	0.00024	0.175426	FALSE
NPD336	GO:0060237	regulation of fungal-type cell wall organization	PKC pathway	8	4	2.56414	0.0078	1	5.25855	0.00024	0.175426	FALSE
NPE16	GO:0006887	exocytosis	exocyst	15	5	2.26097	0.01516	1	4.57876	0.00024	0.175426	FALSE
NPD5164	GO:0006506	GPI anchor biosynthetic process	GPI-anchor transamidase complex	17	4	4.025	0.00356	1	6.06636	0.00024	0.175426	FALSE
NPD6529	GO:0006887	exocytosis	exocyst	15	5	2.53825	0.00892	1	4.47336	0.00024	0.175426	FALSE
NPE812	GO:0006348	chromatin silencing at telomere	COMPASS complex	25	5	2.26538	0.0124	1	5.86997	0.00026	0.183584	FALSE
NP413	GO:0006887	exocytosis	exocyst	15	5	3.22346	0.0026	0.924472	4.06363	0.0001	0.110516	FALSE
Aristolochic acid	GO:0007035	vacuolar acidification	vacuolar proton-transporting V-type ATPase, V1 domain	14	4	2.37678	0.0079	1	6.15906	0.00028	0.190421	FALSE
NPE576	GO:0006506	GPI anchor biosynthetic process	GPI-anchor transamidase complex	17	4	3.04258	0.0098	1	6.01868	0.00028	0.190421	FALSE
NP783	GO:0007035	vacuolar acidification	H+-transporting ATPase, Golgi	14	5	2.97457	0.0032	1	5.94816	0.00028	0.190421	FALSE
NP783	GO:0007035	vacuolar acidification	H+-transporting ATPase, vacuolar	14	5	2.97457	0.0032	1	5.94816	0.00028	0.190421	FALSE
NPD6859	GO:0007035	vacuolar acidification	H+-transporting ATPase, Golgi	14	5	3.86367	0.00328	1	5.89107	0.0003	0.195497	FALSE
NPD6859	GO:0007035	vacuolar acidification	H+-transporting ATPase, vacuolar	14	5	3.86367	0.00328	1	5.89107	0.0003	0.195497	FALSE
NPE794	GO:0006887	exocytosis	exocyst	15	5	2.02862	0.021	1	3.84334	0.0003	0.195497	FALSE
NPE556	GO:0060237	regulation of fungal-type cell wall organization	PKC pathway	8	4	2.26257	0.0187	1	3.94635	0.0003	0.195497	FALSE
NPE248	GO:0007067	mitosis	anaphase-promoting complex	59	6	1.57014	0.05948	1	4.60144	0.00034	0.211516	TRUE
RSOC0460	GO:0060237	regulation of fungal-type cell wall organization	PKC pathway	8	4	2.61732	0.0074	1	4.86722	0.00038	0.23274	TRUE
NPE67	GO:0060237	regulation of fungal-type cell wall organization	PKC pathway	8	4	2.06543	0.0275	1	4.13698	0.0004	0.237257	FALSE
NPD2001	GO:0007067	mitosis	anaphase-promoting complex	59	6	1.68592	0.04864	1	3.6289	0.0004	0.237257	FALSE
NPD7023	GO:0007035	vacuolar acidification	H+-transporting ATPase, Golgi	14	5	3.8848	0.00324	1	5.78105	0.0004	0.237257	FALSE
NPD7023	GO:0007035	vacuolar acidification	H+-transporting ATPase, vacuolar	14	5	3.8848	0.00324	1	5.78105	0.0004	0.237257	FALSE
NPE64	GO:0001558	regulation of cell growth	TORC1 complex (GO)	7	4	2.41842	0.0105	1	3.36325	0.0004	0.237257	FALSE
NPE64	GO:0031929	TOR signaling cascade	TORC1 complex (GO)	6	4	2.5199	0.0088	1	3.36325	0.0004	0.237257	FALSE
Doxorubicin	GO:0060237	regulation of fungal-type cell wall organization	PKC pathway	8	4	2.36373	0.0105	1	3.11225	0.0004	0.237257	FALSE
NPD5767	GO:0007064	mitotic sister chromatid cohesion	nuclear cohesin complex	18	4	3.27185	0.00352	1	3.36673	0.0004	0.237257	FALSE
NPD5902	GO:0007035	vacuolar acidification	H+-transporting ATPase, Golgi	14	5	2.34466	0.0093	1	5.75621	0.00042	0.242868	FALSE
NPD5902	GO:0007035	vacuolar acidification	H+-transporting ATPase, vacuolar	14	5	2.34466	0.0093	1	5.75621	0.00042	0.242868	FALSE
NPD7834	GO:0006506	GPI anchor biosynthetic process	GPI-anchor transamidase complex	17	4	4.49256	0.00216	0.842435	6.33996	0.00012	0.119636	FALSE
NPD6444	GO:0006348	chromatin silencing at telomere	COMPASS complex	25	5	2.98875	0.002	0.815167	6.81529	0.0001	0.110516	FALSE
NPD168	GO:0006348	chromatin silencing at telomere	COMPASS complex	25	5	3.51036	0.0027	0.945311	5.41102	0.00042	0.242868	TRUE
NPD6240	GO:0007035	vacuolar acidification	H+-transporting ATPase, Golgi	14	5	2.86468	0.0025	0.9101	5.82825	0.00038	0.23274	FALSE
NPD6240	GO:0007035	vacuolar acidification	H+-transporting ATPase, vacuolar	14	5	2.86468	0.0025	0.9101	5.82825	0.00038	0.23274	FALSE
NPD5235	GO:0060237	regulation of fungal-type cell wall organization	PKC pathway	8	4	3.41755	0.00212	0.835226	5.45888	0.0002	0.158045	TRUE
NPD6060	GO:0002181	cytoplasmic translation	cytoplasmic ribosomal large subunit	51	24	3.71632	0.00248	0.903115	5.36257	0.00038	0.23274	FALSE
NPE905	GO:0002181	cytoplasmic translation	cytoplasmic ribosomal large subunit	51	24	3.01661	0.0014	0.664883	4.31623	0	0	FALSE
NPD1184	GO:0007067	mitosis	anaphase-promoting complex	59	6	3.45159	0.00228	0.866943	4.5087	0.00038	0.23274	FALSE
NPD2880	GO:0060237	regulation of fungal-type cell wall organization	PKC pathway	8	4	3.12031	0.0016	0.717799	3.90033	0.0001	0.110516	FALSE
NPD7700	GO:0007035	vacuolar acidification	H+-transporting ATPase, Golgi	14	5	3.08656	0.0018	0.76854	6.16371	0.00022	0.165528	FALSE
NPD7700	GO:0007035	vacuolar acidification	H+-transporting ATPase, vacuolar	14	5	3.08656	0.0018	0.76854	6.16371	0.00022	0.165528	FALSE
NPD240	GO:0060237	regulation of fungal-type cell wall organization	PKC pathway	8	4	3.09906	0.0014	0.664883	6.13085	0.0001	0.110516	FALSE
NPD7700	GO:0007035	vacuolar acidification	vacuolar proton-transporting V-type ATPase, V1 domain	14	4	3.08656	0.0018	0.76854	3.54451	0.0004	0.237257	FALSE
NPD1457	GO:0006270	DNA replication initiation	MCM complex (GO)	21	4	3.95258	0.0014	0.664883	5.82965	0.00016	0.141713	FALSE
NPD6224	GO:0060237	regulation of fungal-type cell wall organization	PKC pathway	8	4	3.92171	0.0009	0.520014	5.3127	0	0	FALSE
NPD5992	GO:0006506	GPI anchor biosynthetic process	GPI-anchor transamidase complex	17	4	4.62093	0.00172	0.747934	5.80987	0.00042	0.242868	FALSE
Tamoxifen	GO:0032258	CVT pathway	Golgi transport complex	18	6	4.62357	0.00152	0.698533	6.11978	0.0003	0.195497	FALSE
NP214	GO:0032258	CVT pathway	Golgi transport complex	18	6	4.72409	0.00136	0.656473	7.02149	0.00022	0.165528	FALSE
NPD3	GO:0002181	cytoplasmic translation	cytoplasmic ribosomal large subunit	51	24	3.94083	0.00162	0.722575	5.35567	0.00038	0.23274	FALSE
NPE76	GO:0032258	CVT pathway	Golgi transport complex	18	6	4.53038	0.00166	0.730535	5.73015	0.00042	0.242868	FALSE
NP214	GO:0006506	GPI anchor biosynthetic process	GPI-anchor transamidase complex	17	4	4.90846	0.00126	0.625353	6.24164	0.00016	0.141713	FALSE
NPD5136	GO:0032258	CVT pathway	Golgi transport complex	18	6	4.57317	0.0016	0.717799	5.84136	0.0004	0.237257	FALSE
NPD685	GO:0016255	attachment of GPI anchor to protein	GPI-anchor transamidase complex	4	4	4.66178	0.0016	0.717799	4.91435	0.0004	0.237257	FALSE
Nitrendipine	GO:0007035	vacuolar acidification	H+-transporting ATPase, Golgi	14	5	3.30713	0.0008	0.475984	4.4394	0	0	FALSE
Nitrendipine	GO:0007035	vacuolar acidification	H+-transporting ATPase, vacuolar	14	5	3.30713	0.0008	0.475984	4.4394	0	0	FALSE
Nitrendipine	GO:0007035	vacuolar acidification	vacuolar proton-transporting V-type ATPase, V1 domain	14	4	3.30713	0.0008	0.475984	3.7695	0	0	FALSE
NPE654	GO:0007064	mitotic sister chromatid cohesion	nuclear cohesin complex	18	4	3.66183	0.0015	0.693204	3.15348	0.0004	0.237257	FALSE
NP413	GO:0090522	vesicle tethering involved in exocytosis	exocyst	5	5	3.80689	0.001	0.55441	4.06363	0.0001	0.110516	FALSE
NPE546	GO:0016255	attachment of GPI anchor to protein	GPI-anchor transamidase complex	4	4	4.24733	0.0014	0.664883	4.51084	0.0004	0.237257	FALSE
NPD7538	GO:0007035	vacuolar acidification	H+-transporting ATPase, Golgi	14	5	3.35664	0.0011	0.58073	3.95323	0.0002	0.158045	FALSE
NPD7538	GO:0007035	vacuolar acidification	H+-transporting ATPase, vacuolar	14	5	3.35664	0.0011	0.58073	3.95323	0.0002	0.158045	FALSE
NPD8137	GO:0007035	vacuolar acidification	H+-transporting ATPase, Golgi	14	5	5.02163	0.00068	0.419354	5.24071	0	0	FALSE
NPD8137	GO:0007035	vacuolar acidification	H+-transporting ATPase, vacuolar	14	5	5.02163	0.00068	0.419354	5.24071	0	0	FALSE
NPD4166	GO:0006379	mRNA cleavage	mRNA cleavage factor complex	13	4	3.34444	0.0006	0.389179	4.13197	0	0	FALSE
NPD6099	GO:0000321	re-entry into mitotic cell cycle after pheromone arrest	Far3p/Far7p/Far8p/Far9p/Far10p/Far11p complex	4	4	4.21994	0.0006	0.389179	4.31474	0	0	FALSE
NPD1457	GO:0000727	double-strand break repair via break-induced replication	MCM complex (GO)	16	4	4.22026	0.00094	0.530208	5.82965	0.00016	0.141713	FALSE
NPD666	GO:0006270	DNA replication initiation	MCM complex (GO)	21	4	4.13133	0.00112	0.584185	5.32848	0.00034	0.211516	FALSE
NPE812	GO:0051568	histone H3-K4 methylation	COMPASS complex	8	5	3.38711	0.001	0.55441	5.86997	0.00026	0.183584	FALSE
NPE1055	GO:0032258	CVT pathway	Golgi transport complex	18	6	4.82068	0.0012	0.603875	5.74391	0.00042	0.242868	FALSE
NPD5729	GO:0006887	exocytosis	exocyst	15	5	3.26272	0.001	0.55441	4.19299	0.0003	0.195497	FALSE
NPD7986	GO:0060237	regulation of fungal-type cell wall organization	PKC pathway	8	4	3.50058	0.0008	0.475984	5.93621	0.00012	0.119636	TRUE
Caffeine	GO:0001558	regulation of cell growth	TORC1 complex (GO)	7	4	4.01555	0.0005	0.353632	6.16218	0	0	FALSE
NPE282	GO:0007035	vacuolar acidification	H+-transporting ATPase, Golgi	14	5	3.75223	0.0005	0.353632	4.93124	0	0	FALSE
NPE282	GO:0007035	vacuolar acidification	H+-transporting ATPase, vacuolar	14	5	3.75223	0.0005	0.353632	4.93124	0	0	FALSE
NPD5964	GO:0032258	CVT pathway	Golgi transport complex	18	6	4.08888	0.0005	0.353632	4.56241	0	0	FALSE
NPE115	GO:0032258	CVT pathway	Golgi transport complex	18	6	5.03289	0.00096	0.536156	6.29241	0.0003	0.195497	FALSE
NPD172	GO:0006887	exocytosis	exocyst	15	5	3.6981	0.00102	0.559654	4.30187	0.00036	0.224827	TRUE
NPD5629	GO:0002181	cytoplasmic translation	cytoplasmic ribosomal large subunit	51	24	4.49771	0.0007	0.433558	6.23812	8e-05	0.101799	FALSE
NP783	GO:0006506	GPI anchor biosynthetic process	GPI-anchor transamidase complex	17	4	5.84169	0.00066	0.411562	6.97802	6e-05	0.0833062	FALSE
NPE117	GO:0032258	CVT pathway	Golgi transport complex	18	6	5.12957	0.0009	0.520014	6.01596	0.00032	0.206016	FALSE
NPE208	GO:0060237	regulation of fungal-type cell wall organization	PKC pathway	8	4	3.41591	0.0007	0.433558	5.72631	0.00012	0.119636	TRUE
NPD6148	GO:0006506	GPI anchor biosynthetic process	GPI-anchor transamidase complex	17	4	5.78369	0.00066	0.411562	6.82563	8e-05	0.101799	FALSE
NPD2118	GO:0006887	exocytosis	exocyst	15	5	3.39913	0.0006	0.389179	6.25088	6e-05	0.0833062	FALSE
NPD5011	GO:0070676	intralumenal vesicle formation	ESCRT III complex (GO)	5	4	3.44748	0.00096	0.536156	3.80963	0.00038	0.23274	TRUE
NPE12	GO:0032258	CVT pathway	Golgi transport complex	18	6	5.1644	0.00086	0.497698	6.25254	0.0003	0.195497	FALSE
NPD4451	GO:0043162	ubiquitin-dependent protein catabolic process via the multivesicular body sorting pathway	ESCRT III complex (GO)	11	4	3.49229	0.00072	0.443933	6.04703	0.000174703	0.148846	TRUE
NPE205	GO:0032258	CVT pathway	Golgi transport complex	18	6	5.28008	0.00082	0.484051	6.07274	0.0003	0.195497	FALSE
NPD5677	GO:0006887	exocytosis	exocyst	15	5	3.97214	0.0008	0.475984	4.35479	0.00028	0.190421	FALSE
NPD6617	GO:0006506	GPI anchor biosynthetic process	GPI-anchor transamidase complex	17	4	5.8813	0.00064	0.403182	6.53077	0.00012	0.119636	FALSE
NPD7538	GO:0006506	GPI anchor biosynthetic process	GPI-anchor transamidase complex	17	4	6.44565	0.00042	0.31576	8.154	2e-05	0.0325858	FALSE
NPD3753	GO:0060237	regulation of fungal-type cell wall organization	PKC pathway	8	4	3.19433	0.0008	0.475984	3.53181	0.0003	0.195497	FALSE
Puromycin	GO:0031146	SCF-dependent proteasomal ubiquitin-dependent protein catabolic process	SCF ubiquitin ligase complex (AB)	4	4	3.01511	0.0008	0.475984	3.03259	0.0003	0.195497	FALSE
NPD1784	GO:0032258	CVT pathway	Golgi transport complex	18	6	5.24937	0.00082	0.484051	5.96067	0.00034	0.211516	FALSE
NPD4889	GO:0016255	attachment of GPI anchor to protein	GPI-anchor transamidase complex	4	4	4.70935	0.0007	0.433558	6.12546	0.00022	0.165528	FALSE
NPD1351	GO:0006887	exocytosis	exocyst	15	5	4.91364	0.00032	0.265053	5.07035	0	0	FALSE
NPD4451	GO:0070676	intralumenal vesicle formation	ESCRT III complex (GO)	5	4	3.64652	0.00066	0.411562	6.04703	0.000174703	0.148846	TRUE
NPD5170	GO:0006887	exocytosis	exocyst	15	5	4.09278	0.00068	0.419354	4.77605	0.0002	0.158045	FALSE
NPD6858	GO:0007035	vacuolar acidification	H+-transporting ATPase, Golgi	14	5	3.69241	0.0003	0.255138	4.03392	0	0	FALSE
NPD6858	GO:0007035	vacuolar acidification	H+-transporting ATPase, vacuolar	14	5	3.69241	0.0003	0.255138	4.03392	0	0	FALSE
NPD6033	GO:0006887	exocytosis	exocyst	15	5	4.0878	0.00068	0.419354	4.70233	0.00022	0.165528	FALSE
NPE766	GO:0006506	GPI anchor biosynthetic process	GPI-anchor transamidase complex	17	4	5.79019	0.00066	0.411562	4.03989	0.0002	0.158045	FALSE
NPD7589	GO:0002181	cytoplasmic translation	cytoplasmic ribosomal large subunit	51	24	4.96223	0.00042	0.31576	6.57251	4e-05	0.0624463	FALSE
NPE74	GO:0032258	CVT pathway	Golgi transport complex	18	6	5.82733	0.00056	0.365994	7.69963	0.00012	0.119636	FALSE
NPD7117	GO:0002181	cytoplasmic translation	cytoplasmic ribosomal large subunit	51	24	4.7615	0.0005	0.353632	5.96331	0.0001	0.110516	FALSE
NPD5897	GO:0007035	vacuolar acidification	H+-transporting ATPase, Golgi	14	5	3.84249	0.0005	0.353632	4.41058	0.0001	0.110516	FALSE
NPD5897	GO:0007035	vacuolar acidification	H+-transporting ATPase, vacuolar	14	5	3.84249	0.0005	0.353632	4.41058	0.0001	0.110516	FALSE
NPD6094	GO:0007035	vacuolar acidification	H+-transporting ATPase, Golgi	14	5	3.65628	0.0005	0.353632	4.16854	0.0001	0.110516	FALSE
NPD6094	GO:0007035	vacuolar acidification	H+-transporting ATPase, vacuolar	14	5	3.65628	0.0005	0.353632	4.16854	0.0001	0.110516	FALSE
NPE77	GO:0032258	CVT pathway	Golgi transport complex	18	6	5.84403	0.00054	0.359658	7.62203	0.00012	0.119636	FALSE
NPE1033	GO:0060237	regulation of fungal-type cell wall organization	PKC pathway	8	4	4.03344	0.0007	0.433558	5.04724	0.0003	0.195497	FALSE
Tamoxifen	GO:0007035	vacuolar acidification	H+-transporting ATPase, Golgi	14	5	5.29798	0.00048	0.33931	6.60427	8e-05	0.101799	FALSE
Tamoxifen	GO:0007035	vacuolar acidification	H+-transporting ATPase, vacuolar	14	5	5.29798	0.00048	0.33931	6.60427	8e-05	0.101799	FALSE
NPE84	GO:0032258	CVT pathway	Golgi transport complex	18	6	5.50978	0.00066	0.411562	6.84207	0.00024	0.175426	FALSE
NPD843	GO:0007035	vacuolar acidification	H+-transporting ATPase, Golgi	14	5	3.56336	0.0006	0.389179	6.3131	0.00018	0.154572	FALSE
NPD843	GO:0007035	vacuolar acidification	H+-transporting ATPase, vacuolar	14	5	3.56336	0.0006	0.389179	6.3131	0.00018	0.154572	FALSE
Kundrymycin	GO:0007035	vacuolar acidification	H+-transporting ATPase, Golgi	14	5	5.25913	0.00052	0.353632	6.46739	0.00012	0.119636	FALSE
Kundrymycin	GO:0007035	vacuolar acidification	H+-transporting ATPase, vacuolar	14	5	5.25913	0.00052	0.353632	6.46739	0.00012	0.119636	FALSE
NPD6889	GO:0016255	attachment of GPI anchor to protein	GPI-anchor transamidase complex	4	4	6.06501	0.0005	0.353632	6.61837	0.00012	0.119636	FALSE
NPE587	GO:0002181	cytoplasmic translation	cytoplasmic ribosomal large subunit	51	24	3.29433	0.0006	0.389179	3.97072	0.0002	0.158045	FALSE
NPE766	GO:0016255	attachment of GPI anchor to protein	GPI-anchor transamidase complex	4	4	3.9858	0.0006	0.389179	4.03989	0.0002	0.158045	FALSE
NPD7099	GO:0032258	CVT pathway	Golgi transport complex	18	6	5.32989	0.00076	0.461301	5.89375	0.00038	0.23274	FALSE
NPE755	GO:0032258	CVT pathway	Golgi transport complex	18	6	5.44317	0.00068	0.419354	6.32636	0.0003	0.195497	FALSE
NPD3278	GO:0032258	CVT pathway	Golgi transport complex	18	6	5.51827	0.00066	0.411562	6.48395	0.00028	0.190421	FALSE
NPE56	GO:0032258	CVT pathway	Golgi transport complex	18	6	5.52046	0.00066	0.411562	6.46082	0.00028	0.190421	FALSE
NPD5613	GO:0006887	exocytosis	exocyst	15	5	4.0117	0.00072	0.443933	4.30727	0.00036	0.224827	TRUE
Kundrymycin	GO:0007035	vacuolar acidification	vacuolar proton-transporting V-type ATPase, V1 domain	14	4	5.25913	0.00052	0.353632	6.48833	0.00016	0.141713	FALSE
NPE73	GO:0032258	CVT pathway	Golgi transport complex	18	6	6.22265	0.00034	0.27171	8.56268	4e-05	0.0624463	FALSE
Nitrendipine	GO:0032258	CVT pathway	Golgi transport complex	18	6	5.4799	0.00068	0.419354	5.94393	0.00034	0.211516	FALSE
NPE81	GO:0032258	CVT pathway	Golgi transport complex	18	6	6.04987	0.00044	0.322912	7.70648	0.00012	0.119636	FALSE
NPD7316	GO:0006887	exocytosis	exocyst	15	5	4.56081	0.00044	0.322912	5.30903	0.00012	0.119636	FALSE
NPE936	GO:0006506	GPI anchor biosynthetic process	GPI-anchor transamidase complex	17	4	6.36965	0.00044	0.322912	6.41131	0.00012	0.119636	FALSE
NPE794	GO:0032258	CVT pathway	Golgi transport complex	18	6	5.55522	0.00062	0.394943	6.05804	0.0003	0.195497	FALSE
NPD8128	GO:0007035	vacuolar acidification	vacuolar proton-transporting V-type ATPase, V1 domain	14	4	3.88303	0.0004	0.306939	3.85589	0.0001	0.110516	FALSE
NPD5632	GO:0006506	GPI anchor biosynthetic process	GPI-anchor transamidase complex	17	4	6.60918	0.0004	0.306939	4.04315	0.0001	0.110516	FALSE
NPD5154	GO:0060237	regulation of fungal-type cell wall organization	PKC pathway	8	4	3.84825	0.0005	0.353632	4.4152	0.0002	0.158045	FALSE
Tyrocidine B	GO:0032258	CVT pathway	Golgi transport complex	18	6	5.8806	0.00054	0.359658	7.05035	0.00022	0.165528	FALSE
NPD2683	GO:0031929	TOR signaling cascade	TORC1 complex (GO)	6	4	3.79704	0.0004	0.306939	7.65509	0.00012	0.119636	TRUE
NPD3076	GO:0007021	tubulin complex assembly	prefoldin complex	7	5	6.6009	0.0004	0.306939	6.78042	0.00012	0.119636	FALSE
NPD5992	GO:0006487	protein N-linked glycosylation	oligosaccharyl transferase complex (GO)	13	5	5.92418	0.00066	0.411562	7.86436	0.00036	0.224827	FALSE
NPE636	GO:0006506	GPI anchor biosynthetic process	GPI-anchor transamidase complex	17	4	6.15026	0.00048	0.33931	5.0432	0.0002	0.158045	FALSE
NPD5011	GO:0043162	ubiquitin-dependent protein catabolic process via the multivesicular body sorting pathway	ESCRT III complex (GO)	11	4	3.51832	0.00066	0.411562	3.80963	0.00038	0.23274	TRUE
NPD666	GO:0000727	double-strand break repair via break-induced replication	MCM complex (GO)	16	4	4.85504	0.0006	0.389179	5.32848	0.00034	0.211516	FALSE
NPD6773	GO:0007021	tubulin complex assembly	prefoldin complex	7	5	5.85401	0.00054	0.359658	5.84738	0.00026	0.183584	TRUE
NPD6664	GO:0007021	tubulin complex assembly	prefoldin complex	7	5	6.57652	0.0004	0.306939	6.40189	0.00014	0.131544	FALSE
NPD8030	GO:0002181	cytoplasmic translation	cytoplasmic ribosomal large subunit	51	24	4.54231	0.00066	0.411562	3.99288	0.0004	0.237257	FALSE
NPD6889	GO:0006506	GPI anchor biosynthetic process	GPI-anchor transamidase complex	17	4	6.85814	0.00038	0.291447	6.61837	0.00012	0.119636	FALSE
NP266	GO:0007021	tubulin complex assembly	prefoldin complex	7	5	6.8419	0.00038	0.291447	6.4192	0.00012	0.119636	FALSE
NPE1	GO:0032258	CVT pathway	Golgi transport complex	18	6	5.86568	0.00054	0.359658	6.55622	0.00028	0.190421	TRUE
NPD2666	GO:0007021	tubulin complex assembly	prefoldin complex	7	5	6.94002	0.00036	0.284806	6.57244	0.00012	0.119636	FALSE
NPD4615	GO:0007021	tubulin complex assembly	prefoldin complex	7	5	7.18832	0.00032	0.265053	7.26092	8e-05	0.101799	FALSE
Alverine citrate	GO:0007035	vacuolar acidification	H+-transporting ATPase, Golgi	14	5	3.74123	0.0005	0.353632	5.95164	0.00028	0.190421	FALSE
Alverine citrate	GO:0007035	vacuolar acidification	H+-transporting ATPase, vacuolar	14	5	3.74123	0.0005	0.353632	5.95164	0.00028	0.190421	FALSE
NPD2531	GO:0070676	intralumenal vesicle formation	ESCRT III complex (GO)	5	4	3.6848	0.00058	0.374623	5.81208	0.000349406	0.217443	FALSE
NPE801	GO:0032258	CVT pathway	Golgi transport complex	18	6	5.98349	0.00046	0.331321	6.9115	0.00024	0.175426	FALSE
NPD2370	GO:0007021	tubulin complex assembly	prefoldin complex	7	5	7.21228	0.00032	0.265053	6.92515	0.0001	0.110516	FALSE
NPD7699	GO:0007021	tubulin complex assembly	prefoldin complex	7	5	7.28383	0.00032	0.265053	6.90021	0.0001	0.110516	FALSE
NPD168	GO:0051568	histone H3-K4 methylation	COMPASS complex	8	5	4.90668	0.00062	0.394943	5.41102	0.00042	0.242868	TRUE
Rapamycin	GO:0032258	CVT pathway	Golgi transport complex	18	6	6.20346	0.00034	0.27171	7.57591	0.00012	0.119636	FALSE
NPD2119	GO:0007021	tubulin complex assembly	prefoldin complex	7	5	7.13033	0.00034	0.27171	6.80816	0.00012	0.119636	FALSE
NPE58	GO:0007035	vacuolar acidification	H+-transporting ATPase, Golgi	14	5	3.26703	0.0006	0.389179	4.19399	0.0004	0.237257	FALSE
NPE58	GO:0007035	vacuolar acidification	H+-transporting ATPase, vacuolar	14	5	3.26703	0.0006	0.389179	4.19399	0.0004	0.237257	FALSE
NP38	GO:0051568	histone H3-K4 methylation	COMPASS complex	8	5	3.59079	0.0004	0.306939	3.84393	0.0002	0.158045	FALSE
NP952	GO:0007035	vacuolar acidification	H+-transporting ATPase, Golgi	14	5	3.71791	0.0004	0.306939	3.7189	0.0002	0.158045	FALSE
NP952	GO:0007035	vacuolar acidification	H+-transporting ATPase, vacuolar	14	5	3.71791	0.0004	0.306939	3.7189	0.0002	0.158045	FALSE
NPD6009	GO:0007035	vacuolar acidification	H+-transporting ATPase, Golgi	14	5	5.76565	0.00032	0.265053	6.38089	0.00012	0.119636	FALSE
NPD6009	GO:0007035	vacuolar acidification	H+-transporting ATPase, vacuolar	14	5	5.76565	0.00032	0.265053	6.38089	0.00012	0.119636	FALSE
NPD4365	GO:0007021	tubulin complex assembly	prefoldin complex	7	5	7.17566	0.00032	0.265053	6.82601	0.00012	0.119636	FALSE
NPD5371	GO:0016255	attachment of GPI anchor to protein	GPI-anchor transamidase complex	4	4	4.87437	0.0004	0.306939	6.13199	0.00022	0.165528	FALSE
NPE76	GO:0007035	vacuolar acidification	H+-transporting ATPase, Golgi	14	5	5.38418	0.00046	0.331321	5.99677	0.00028	0.190421	FALSE
NPE76	GO:0007035	vacuolar acidification	H+-transporting ATPase, vacuolar	14	5	5.38418	0.00046	0.331321	5.99677	0.00028	0.190421	FALSE
NPD4166	GO:0007021	tubulin complex assembly	prefoldin complex	7	5	7.10154	0.00034	0.27171	6.38969	0.00014	0.131544	FALSE
NPE1212	GO:0007021	tubulin complex assembly	prefoldin complex	7	5	6.47411	0.00044	0.322912	5.93838	0.00026	0.183584	FALSE
NPD6044	GO:0032258	CVT pathway	Golgi transport complex	18	6	5.95348	0.00046	0.331321	6.40499	0.0003	0.195497	FALSE
NPD2683	GO:0001558	regulation of cell growth	TORC1 complex (GO)	7	4	3.62992	0.0003	0.255138	7.65509	0.00012	0.119636	TRUE
NPE79	GO:0032258	CVT pathway	Golgi transport complex	18	6	6.25254	0.00032	0.265053	7.46941	0.00014	0.131544	FALSE
Daunorubicin(Daunomycin)	GO:0010499	proteasomal ubiquitin-independent protein catabolic process	20S proteasome core particle	7	7	5.86331	0.00058	0.374623	6.03906	0.00042	0.242868	FALSE
NPD5164	GO:0016255	attachment of GPI anchor to protein	GPI-anchor transamidase complex	4	4	5.86403	0.0004	0.306939	6.06636	0.00024	0.175426	FALSE
NPD4188	GO:0051568	histone H3-K4 methylation	COMPASS complex	8	5	5.34199	0.00038	0.291447	6.12483	0.00022	0.165528	FALSE
NPD414	GO:0007035	vacuolar acidification	H+-transporting ATPase, Golgi	14	5	5.69493	0.00032	0.265053	6.33052	0.00016	0.141713	FALSE
NPD414	GO:0007035	vacuolar acidification	H+-transporting ATPase, vacuolar	14	5	5.69493	0.00032	0.265053	6.33052	0.00016	0.141713	FALSE
NPD4437	GO:0032258	CVT pathway	Golgi transport complex	18	6	5.90705	0.0005	0.353632	5.85043	0.00038	0.23274	FALSE
NPD7686	GO:0016255	attachment of GPI anchor to protein	GPI-anchor transamidase complex	4	4	5.77965	0.00042	0.31576	5.14403	0.0003	0.195497	FALSE
NPD666	GO:0006267	pre-replicative complex assembly involved in nuclear cell cycle DNA replication	MCM complex (GO)	12	4	5.1328	0.00046	0.331321	5.32848	0.00034	0.211516	FALSE
NPD4502	GO:0006506	GPI anchor biosynthetic process	GPI-anchor transamidase complex	17	4	6.9722	0.00036	0.284806	6.13617	0.00022	0.165528	FALSE
NPD5371	GO:0006506	GPI anchor biosynthetic process	GPI-anchor transamidase complex	17	4	7.03713	0.00036	0.284806	6.13199	0.00022	0.165528	FALSE
NPE107	GO:0032258	CVT pathway	Golgi transport complex	18	6	6.23136	0.00034	0.27171	7.33036	0.00018	0.154572	FALSE
NPE139	GO:0007035	vacuolar acidification	H+-transporting ATPase, Golgi	14	5	3.24074	0.0005	0.353632	3.87908	0.0004	0.237257	FALSE
NPE139	GO:0007035	vacuolar acidification	H+-transporting ATPase, vacuolar	14	5	3.24074	0.0005	0.353632	3.87908	0.0004	0.237257	FALSE
NPD4344	GO:0016255	attachment of GPI anchor to protein	GPI-anchor transamidase complex	4	4	3.87447	0.0005	0.353632	3.79731	0.0004	0.237257	FALSE
Alverine citrate	GO:0007035	vacuolar acidification	vacuolar proton-transporting V-type ATPase, V1 domain	14	4	3.74123	0.0005	0.353632	3.57969	0.0004	0.237257	FALSE
NPD6145	GO:0090522	vesicle tethering involved in exocytosis	exocyst	5	5	3.46794	0.0004	0.306939	3.31524	0.0003	0.195497	FALSE
Thioflavin T	GO:0007021	tubulin complex assembly	prefoldin complex	7	5	6.68923	0.0004	0.306939	3.58165	0.0003	0.195497	FALSE
NPD6240	GO:0032258	CVT pathway	Golgi transport complex	18	6	6.00755	0.00044	0.322912	5.90848	0.00034	0.211516	FALSE
NPD5992	GO:0016255	attachment of GPI anchor to protein	GPI-anchor transamidase complex	4	4	5.62721	0.0005	0.353632	5.80987	0.00042	0.242868	FALSE
NPD2201	GO:0007021	tubulin complex assembly	prefoldin complex	7	5	7.15142	0.00032	0.265053	6.26805	0.00018	0.154572	FALSE
cis-Androsterone	GO:0007021	tubulin complex assembly	prefoldin complex	7	5	6.07332	0.00046	0.331321	5.55948	0.00036	0.224827	FALSE
NPD7200	GO:0007021	tubulin complex assembly	prefoldin complex	7	5	6.2513	0.00046	0.331321	5.51102	0.00036	0.224827	FALSE
NPD5604	GO:0000321	re-entry into mitotic cell cycle after pheromone arrest	Far3p/Far7p/Far8p/Far9p/Far10p/Far11p complex	4	4	5.96945	0.00042	0.31576	6.01742	0.00034	0.211516	FALSE
NPD1138	GO:0000321	re-entry into mitotic cell cycle after pheromone arrest	Far3p/Far7p/Far8p/Far9p/Far10p/Far11p complex	4	4	5.97186	0.00042	0.31576	6.01108	0.00034	0.211516	FALSE
NPD5729	GO:0007035	vacuolar acidification	H+-transporting ATPase, Golgi	14	5	5.46126	0.00038	0.291447	5.93112	0.00028	0.190421	FALSE
NPD5729	GO:0007035	vacuolar acidification	H+-transporting ATPase, vacuolar	14	5	5.46126	0.00038	0.291447	5.93112	0.00028	0.190421	FALSE
NPE576	GO:0016255	attachment of GPI anchor to protein	GPI-anchor transamidase complex	4	4	5.90343	0.00038	0.291447	6.01868	0.00028	0.190421	FALSE
NPD2735	GO:0006887	exocytosis	exocyst	15	5	3.55283	0.0003	0.255138	5.05711	0.00018	0.154572	FALSE
NPD1498	GO:0016255	attachment of GPI anchor to protein	GPI-anchor transamidase complex	4	4	4.37971	0.0003	0.255138	4.38713	0.0002	0.158045	FALSE
NPD2338	GO:0007021	tubulin complex assembly	prefoldin complex	7	5	6.94113	0.00036	0.284806	5.8155	0.00028	0.190421	FALSE
NPE607	GO:0032258	CVT pathway	Golgi transport complex	18	6	6.04743	0.00044	0.322912	5.90264	0.00038	0.23274	FALSE
NPD4465	GO:0007021	tubulin complex assembly	prefoldin complex	7	5	7.25881	0.00032	0.265053	6.0876	0.00024	0.175426	FALSE
NP45	GO:0016255	attachment of GPI anchor to protein	GPI-anchor transamidase complex	4	4	5.76399	0.00042	0.31576	5.89417	0.00038	0.23274	FALSE
NPD7893	GO:0007021	tubulin complex assembly	prefoldin complex	7	5	7.28031	0.00032	0.265053	6.02731	0.00026	0.183584	FALSE
NPD5307	GO:0010499	proteasomal ubiquitin-independent protein catabolic process	20S proteasome core particle	7	7	5.9588	0.00044	0.322912	5.98912	0.00042	0.242868	FALSE
NPD6238	GO:0010499	proteasomal ubiquitin-independent protein catabolic process	20S proteasome core particle	7	7	6.2214	0.00038	0.291447	6.42632	0.00034	0.211516	TRUE
NP779	GO:0010499	proteasomal ubiquitin-independent protein catabolic process	20S proteasome core particle	7	7	6.85751	0.0003	0.255138	7.02604	0.00024	0.175426	TRUE
NPD3	GO:0010499	proteasomal ubiquitin-independent protein catabolic process	20S proteasome core particle	7	7	6.2745	0.00036	0.284806	6.60983	0.00032	0.206016	FALSE
NPD4087	GO:0010499	proteasomal ubiquitin-independent protein catabolic process	20S proteasome core particle	7	7	6.33455	0.00036	0.284806	6.48264	0.00032	0.206016	FALSE
NPD2880	GO:0010499	proteasomal ubiquitin-independent protein catabolic process	20S proteasome core particle	7	7	6.38949	0.00036	0.284806	6.48803	0.00032	0.206016	FALSE
NPD5953	GO:0010499	proteasomal ubiquitin-independent protein catabolic process	20S proteasome core particle	7	7	6.05081	0.00042	0.31576	6.15791	0.0004	0.237257	TRUE
NPD520	GO:0010499	proteasomal ubiquitin-independent protein catabolic process	20S proteasome core particle	7	7	6.56248	0.00032	0.265053	6.90092	0.00028	0.190421	FALSE
NP45	GO:0006506	GPI anchor biosynthetic process	GPI-anchor transamidase complex	17	4	6.7892	0.0004	0.306939	5.89417	0.00038	0.23274	FALSE
NPD4205	GO:0010499	proteasomal ubiquitin-independent protein catabolic process	20S proteasome core particle	7	7	5.99829	0.00042	0.31576	6.06287	0.00042	0.242868	TRUE
NP304	GO:0010499	proteasomal ubiquitin-independent protein catabolic process	20S proteasome core particle	7	7	6.85669	0.0003	0.255138	6.975	0.00026	0.183584	FALSE
NPD5188	GO:0006378	mRNA polyadenylation	mRNA cleavage factor complex	8	4	3.78707	0.0004	0.306939	3.97202	0.0004	0.237257	FALSE
NPD2888	GO:0006337	nucleosome disassembly	RSC complex (AB)	7	7	6.1783	0.0004	0.306939	6.13887	0.0004	0.237257	FALSE
NPD5697	GO:0006337	nucleosome disassembly	RSC complex (AB)	7	7	6.15359	0.0004	0.306939	6.07283	0.0004	0.237257	FALSE
Acriflavine	GO:0000084	S phase of mitotic cell cycle	MCM complex (GO)	8	4	3.6984	0.0004	0.306939	3.58636	0.0004	0.237257	FALSE
NP952	GO:0007035	vacuolar acidification	vacuolar proton-transporting V-type ATPase, V1 domain	14	4	3.71791	0.0004	0.306939	3.55726	0.0004	0.237257	FALSE
NPD2174	GO:0010499	proteasomal ubiquitin-independent protein catabolic process	20S proteasome core particle	7	7	6.25449	0.00038	0.291447	6.33317	0.00036	0.224827	FALSE
NPD172	GO:0090522	vesicle tethering involved in exocytosis	exocyst	5	5	4.26946	0.00038	0.291447	4.30187	0.00036	0.224827	TRUE
NPD5141	GO:0010499	proteasomal ubiquitin-independent protein catabolic process	20S proteasome core particle	7	7	6.4221	0.00034	0.27171	6.46001	0.00034	0.211516	FALSE
NPD5613	GO:0090522	vesicle tethering involved in exocytosis	exocyst	5	5	4.28234	0.00036	0.284806	4.30727	0.00036	0.224827	TRUE
NP38	GO:0006337	nucleosome disassembly	RSC complex (AB)	7	7	6.40289	0.00036	0.284806	6.39294	0.00036	0.224827	FALSE
NP107	GO:0006337	nucleosome disassembly	RSC complex (AB)	7	7	6.44708	0.00036	0.284806	6.3912	0.00036	0.224827	FALSE
NPD4344	GO:0010499	proteasomal ubiquitin-independent protein catabolic process	20S proteasome core particle	7	7	6.68764	0.0003	0.255138	6.71415	0.0003	0.195497	FALSE
NPD5179	GO:0001558	regulation of cell growth	TORC1 complex (GO)	7	4	3.32521	0.0003	0.255138	5.96282	0.00032	0.206016	FALSE
NPD22	GO:0007021	tubulin complex assembly	prefoldin complex	7	5	6.97213	0.00036	0.284806	5.44675	0.0004	0.237257	FALSE
NPD666	GO:0000084	S phase of mitotic cell cycle	MCM complex (GO)	8	4	5.32615	0.0003	0.255138	5.32848	0.00034	0.211516	FALSE
NPD2212	GO:0006506	GPI anchor biosynthetic process	glycosylphosphatidylinositol-N-acetylglucosaminyltransferase (GPI-GnT) complex (GO)	17	4	7.32269	0.0003	0.255138	7.5149	0.0004	0.237257	FALSE
NPD555	GO:0006337	nucleosome disassembly	RSC complex (AB)	7	7	4.35014	0.0003	0.255138	3.85871	0.0004	0.237257	FALSE
NPD6009	GO:0007035	vacuolar acidification	vacuolar proton-transporting V-type ATPase, V1 domain	14	4	5.76565	0.00032	0.265053	5.91897	0.00044	0.248531	FALSE
